# Inhibition of Diacylglycerol-Sensitive TRPC Channels by Synthetic and Natural Steroids

Susanne Mieke, Peter Crause, Thorsten Schmidt, Matthias Löhn, Heinz-Werner Kleemann, Thomas Licher, Werner Dittrich, Hartmut Rütten, Carsten Strübing\*

Sanofi-Aventis Deutschland GmbH, Research and Development, Frankfurt am Main, Germany

## Abstract

TRPC channels are a family of nonselective cation channels that regulate ion homeostasis and intracellular  $\text{Ca}^{2+}$  signaling in numerous cell types. Important physiological functions such as vasoregulation, neuronal growth, and pheromone recognition have been assigned to this class of ion channels. Despite their physiological relevance, few selective pharmacological tools are available to study TRPC channel function. We, therefore, screened a selection of pharmacologically active compounds for TRPC modulating activity. We found that the synthetic gestagen norgestimate inhibited diacylglycerol-sensitive TRPC3 and TRPC6 with  $\text{IC}_{50}$ s of 3–5  $\mu\text{M}$ , while half-maximal inhibition of TRPC5 required significantly higher compound concentrations ( $>10 \mu\text{M}$ ). Norgestimate blocked TRPC-mediated vasopressin-induced cation currents in A7r5 smooth muscle cells and caused vasorelaxation of isolated rat aorta, indicating that norgestimate could be an interesting tool for the investigation of TRP channel function in native cells and tissues. The steroid hormone progesterone, which is structurally related to norgestimate, also inhibited TRPC channel activity with  $\text{IC}_{50}$ s ranging from 6 to 18  $\mu\text{M}$  but showed little subtype selectivity. Thus, TRPC channel inhibition by high gestational levels of progesterone may contribute to the physiological decrease of uterine contractility and immunosuppression during pregnancy.

**Citation:** Mieke S, Crause P, Schmidt T, Löhn M, Kleemann H-W, et al. (2012) Inhibition of Diacylglycerol-Sensitive TRPC Channels by Synthetic and Natural Steroids. PLoS ONE 7(4): e35393. doi:10.1371/journal.pone.0035393

**Editor:** David E. Clapham, Harvard Medical School, United States of America

**Received:** March 3, 2011; **Accepted:** March 16, 2012; **Published:** April 17, 2012

**Copyright:** © 2012 Mieke et al. This is an open-access article distributed under the terms of the Creative Commons Attribution License, which permits unrestricted use, distribution, and reproduction in any medium, provided the original author and source are credited.

**Funding:** This work was funded by Sanofi-Aventis. The funder employed the authors, who designed the study, collected the data, analyzed the data, and prepared the manuscript. Sanofi-Aventis approved the decision to publish the manuscript.

**Competing Interests:** All authors were employees of Sanofi-Aventis at the time this study was conducted. SM, H-WK, and CS are inventors on a patent application (WO 2009052972 A2) related to this work. This does not alter the authors' adherence to all the PLoS ONE policies on sharing data and materials.

\* E-mail: carsten.struebing@sanofi.com

## Introduction

Transient receptor potential canonical (TRPC) channels belong to the TRP cation channel superfamily. Seven TRPC channels, TRPC1–7, have been found in rodents. They all conduct  $\text{Ca}^{2+}$  in addition to monovalent cations and can be activated via membrane receptors linked to phospholipase C signaling. Downstream of phospholipase C the activation mechanisms of TRPC channels are not well defined but one subclass, namely TRPC3, –6 and –7, as well as the structurally more distinct TRPC2 respond to the phospholipase C hydrolysis product diacylglycerol. The remaining family members, however, are diacylglycerol-insensitive (reviewed in [1–3]).

Genetic models have been instrumental in defining the physiological roles of TRPC channels. The involvement of TRPC4 and TRPC6 in vasoregulation [4,5], TRPC1 in muscle function [6,7], TRPC2 in pheromone signaling [8,9], TRPC3 in motor coordination [10,11], and most recently of TRPC5 [12] in innate fear responses has been elucidated using knockout mice.

Despite the substantial progress made, important questions regarding TRPC channel function and regulation remain, and it would be highly desirable to verify and extend studies in genetically modified mice by pharmacological means in non-engineered animals. Unfortunately, such experiments have proved difficult due to the lack of specific compounds that modulate TRPC channels. Tools such as SKF96365 [13,14], KB-R7943 [15] or BTP-2 [16] do not discriminate between TRPC homologs and

also alter the activity of other ion channels or transporters [14,17]. Only recently the first subtype –specific TRPC inhibitor was discovered. This compound, the pyrazole Pyr3, inhibited TRPC3 with a half maximal inhibitory concentration ( $\text{IC}_{50}$ ) of 0.7  $\mu\text{M}$  without having effects on other TRPC channels. Using Pyr3 an involvement of TRPC3 in the development of cardiac hypertrophy could be demonstrated *in vivo* [18].

To enrich the repertoire of pharmacological tool compounds for TRPC channels and to identify new natural channel modulators, we screened a library of pharmacologically and biologically active compounds for their effects on TRPC6-mediated  $\text{Ca}^{2+}$  entry. We found that norgestimate, a synthetic steroid and active ingredient of certain contraceptives, preferentially inhibited TRPC3 and –6 channels at low micromolar concentrations. The endogenous gestagen progesterone also inhibited TRPC channels but showed little subtype selectivity.

Interestingly, a recent study by Majeed et al. [19] demonstrated inhibition of TRPC5 by neurosteroids including pregnenolone sulphate and progesterone. Our data now show that steroid modulation is a common feature of TRPC family members and reveal structural determinants of selective TRPC channel inhibition by progestins.

Hence, TRPC channels may contribute to diverse steroid actions ranging from progesterone-induced vascular remodelling and decrease in uterine contractility during pregnancy to cardiovascular side-effects of oral contraceptives.

## Materials and Methods

### Cell culture and cell line generation

Cells were grown at 37°C in a humidified atmosphere (5% or 7% CO<sub>2</sub>) under standard cell culture conditions. Stable human embryonic kidney (HEK) cell lines expressing recombinant mTRPC4B (GenBank accession number AAC05178); mTRPC5 (GenBank accession number NM\_009428) or hTRPC6 (GenBank accession number AF080394) under the control of a tetracycline-inducible promoter were generated using the Flp-In T-Rex (FITR) system (Invitrogen, Karlsruhe, Germany). TRPC4/5/6 HEK-FITR cells were maintained in Dulbecco's modified eagle medium (DMEM, with glutaMAX I, 4.5 g/l glucose and 110 mg/ml sodium pyruvate) supplemented with 10% (v/v) fetal bovine serum (Biochrom, Berlin, Germany), 1 mM glutamine, 1 mM MEM sodium pyruvate, 40 µg/ml hygromycin (50 µg/ml for mTRPC5 HEK-FITR cells), and 15 µg/ml blasticidine HCl. Channel expression was induced by supplementing the growth medium for 18–24 h with 1 µg/ml doxycycline.

hTRPC3 (GenBank accession number NM\_003305) was stably expressed in chinese hamster ovary (CHO) cells using a proprietary high expression vector (Steinbeis –Transferzentrum für Angewandte Biologische Chemie, Mannheim, Germany).

For measurement of norgestimate effects on adrenoceptor signaling a CHO cell line stably expressing human  $\alpha_{1A}$ -receptors (GenBank accession number NM\_000680.2) under control of a CMV promoter was used. CHO cells were kept in HAM's F-12 medium (with glutaMAX I) supplemented with 10% (v/v) fetal bovine serum (Biochrom), 1 mM glutamine, and 0.6 mg/ml geneticin.

A7r5 cells (ATCC, Rockville, USA) were maintained in DMEM (with glutaMAX I, 4.5 g/l glucose and 110 mg/ml sodium pyruvate), supplemented with 10% (v/v) fetal bovine serum (PAA, Pasching, Austria).

### Measurement of intracellular calcium concentration

([Ca<sup>2+</sup>]<sub>i</sub>)

**Fluo-4 measurements.** Cells grown to an almost confluent monolayer on black poly-D-lysine coated 96-well plates (Greiner, Frickenhausen, Germany) were washed with standard extracellular solution (140 mM NaCl, 1 mM MgCl<sub>2</sub>, 5.4 mM KCl, 2 mM CaCl<sub>2</sub>, 10 mM HEPES, 10 mM glucose, pH 7.35) and stained (30 min, room temperature) with dye solution (2 µM fluo-4 AM, 0.02% pluronic F127, 0.1% bovine serum albumin in standard extracellular solution). Cells were washed and either incubated with standard extracellular solution only or with different concentrations of test compounds for 10 min. Fluo-4 fluorescence was excited at 488 nm with an argon laser and measured using a fluorometric imaging plate reader (Molecular Devices, Sunnyvale, USA). All fluorometric measurements were performed at room temperature.

Ca<sup>2+</sup> entry into TRPC3 CHO and TRPC6 HEK-FITR cells was elicited by application of the diacylglycerol analog 1-oleoyl-2-acetyl-sn-glycerol (OAG). For calculation of norgestimate- and progesterone-induced inhibition of TRPC3- and TRPC6-mediated Ca<sup>2+</sup> entry fluorescence values were plotted versus time and the area under the curve was considered as a measure of Ca<sup>2+</sup> influx. Baseline fluorescence in non-OAG-stimulated cells and OAG-stimulated Ca<sup>2+</sup> influx into control cells not treated with inhibitors were defined as 0% and 100% influx, respectively.

TRPC4- and TRPC5-mediated Ca<sup>2+</sup> influx was stimulated by application of trypsin that activates endogenous G<sub>q</sub>-coupled protease activated receptors in HEK cells [20]. As trypsin, via phospholipase C activation, causes Ca<sup>2+</sup> release from internal

stores (PI response) and subsequent Ca<sup>2+</sup> entry through native store-operated channels, these components had to be subtracted from the total fluorescence signal in order to determine TRPC-mediated Ca<sup>2+</sup> entry. For this purpose trypsin-induced Ca<sup>2+</sup> responses in non-induced TRPC4- and TRPC5 HEK-FITR cells lacking functional expression of the TRPC channels were measured in parallel to responses in induced cells and were subtracted from the fluorescence traces. Compound effects were then calculated from the area under the curve and normalized to the Ca<sup>2+</sup> influx into trypsin-stimulated, non-compound-treated cells.

[Ca<sup>2+</sup>]<sub>i</sub> measurements in CHO cells stably expressing human  $\alpha_{1A}$ -receptors were performed essentially as described for HEK-FITR cells. The  $\alpha_1$ -agonist phenylephrine was used for receptor stimulation.

**Fura-2 measurements.** Cells grown on poly-L-lysine-coated 24-mm glass coverslips were loaded in cell culture medium supplemented with 2 µM fura-2 AM (30 min, 37°C) and subsequently allowed to de-esterify in standard extracellular solution (15 min, 37°C). Changes in [Ca<sup>2+</sup>]<sub>i</sub> were measured using a monochromator-based imaging system (T.I.L.L. Photonics, Gräfelfing, Germany) mounted on an inverted Axiovert 200 microscope (Zeiss, Göttingen, Germany). Fluorescence was excited alternating at 340 nm and 380 nm, long-pass filtered at 440 nm and captured at 2 s intervals. The 340/380 nm excitation ratio of selected cell areas was calculated with T.I.L.L. vision 4.0 software (T.I.L.L. Photonics) after correction for background fluorescence.

### Electrophysiological techniques

The whole-cell patch clamp technique [21] was employed to measure ion currents from single cells. Heat-polished patch pipettes with resistances of 2–4 MΩ were pulled from borosilicate glass capillaries (Hilgenberg, Malsfeld, Germany) using a DMZ-Universal puller (Zeitz-Instruments, Munich, Germany) and filled with standard intracellular solution containing: 120 mM CsOH, 120 mM gluconic acid, 2 mM MgCl<sub>2</sub>, 3 mM CaCl<sub>2</sub>, 5 mM Cs<sub>4</sub>-BAPTA, 10 mM HEPES (pH 7.4 adjusted with gluconic acid). For agonist-independent stimulation of TRPC currents the intracellular solution was supplemented with 30 µM AlCl<sub>3</sub> and 10 mM NaF and cells were infused with AlF<sub>4</sub><sup>−</sup> through the patch pipette. AlF<sub>4</sub><sup>−</sup> is a non-specific activator of heterotrimeric G proteins that consequently leads to increased phospholipase C activity and TRPC channel activation.

The extracellular solution for recording of TRPC currents contained: 140 mM NaCl, 5.4 mM KCl, 2 mM CaCl<sub>2</sub>, 1 mM MgCl<sub>2</sub>, 10 mM glucose, 10 mM HEPES (pH 7.4 adjusted with NaOH).

For measurement of [Arg<sup>8</sup>]-vasopressin (AVP) – induced currents in A7r5 cells the Ca<sup>2+</sup> concentration of the extracellular solution was lowered to 0.2 mM.

Cells grown on poly-L-lysine-coated coverslips were continuously superfused with extracellular solution and substances were applied using an ALA BPS-8 perfusion system (ALA Scientific Instruments, Westbury, USA). Whole-cell recordings were performed with an EPC-10 amplifier and Pulse software (HEKA, Lambrecht, Germany). Cells were held at −70 mV, and current-voltage (I–V) relationships were routinely measured every 2 or 3 s by applying voltage ramps (180 ms) from −100 mV to +80 mV. Data was acquired at 6.67 kHz and filtered with 2.22 kHz. After establishing the whole cell configuration the series resistance was usually <10 MΩ and was compensated 50–70%. All experiments were performed at room temperature.

## Ethics statement

Animals were used for organ retrieval only and were sacrificed according to Sanofi-Aventis Ethical Committee guidelines and to the Guide for the Care and Use of Laboratory Animals published by the National Institutes of Health. Sanofi-Aventis is an authorized institution to house and handle laboratory animals according to §11 German Animal Welfare Act, and has a nominated animal welfare officer. Sanofi-Aventis is also AAALAC (Association for Assessment and Accreditation of Laboratory Animal Care International) accredited. The competent authority (Regierungspräsidium Darmstadt) has been notified of the procedure under protocol number T04-01/102.

## In vitro vascular function

Adult male Wistar-Unilever rats (8–11 weeks old; Harlan Winkelmann, Borcheln, Germany) were sacrificed by decapitation. Thoracic aortas were excised quickly, transferred to cold (4°C), carbogen (95% O<sub>2</sub> and 5% CO<sub>2</sub>) bubbled physiological salt solution (119 mM NaCl, 4.7 mM KCl, 1.2 KH<sub>2</sub>PO<sub>4</sub>, 1.2 mM MgSO<sub>4</sub>, 1.6 mM CaCl<sub>2</sub>, 25 mM NaHCO<sub>3</sub>, 11 mM glucose) and rinsed. After removal of connective tissue and perivascular fat aortas were dissected in 5 mm rings, connected to force transducers and equilibrated in carbogen bubbled physiological

salt solution at 37°C for 15 min. Aortic rings were set at 1000 mg passive tension and contractile forces were then measured isometrically using standard bath procedures as described earlier [22]. Vessels strongly contracting after application of 60 mM KCl were defined as intact and used for further experiments. To minimize the contribution of endothelium-derived nitric oxide to compound-induced force changes experiments were performed in the presence of the nitric oxide synthase inhibitor nitro-L-arginine methyl ester (L-NAME).

## Materials

DMEM, HAM's F12, glutamine, MEM sodium pyruvate, hygromycin B, blasticidine HCl, geneticin, Fura-2 AM, Fluo-4 AM, Pluronic F127, and Cs<sub>4</sub>-BAPTA were from Invitrogen, MgCl<sub>2</sub> and MgSO<sub>4</sub> from Merck (Darmstadt, Germany), doxycycline from BD Biosciences (Heidelberg, Germany), OAG from Avanti Polar Lipids Inc. (Alabaster, USA), and norgestimate from ChemPacific Corporation (Baltimore, USA). All other chemicals were from Sigma-Aldrich (Munich, Germany).

## Statistics

For statistical analysis, analysis of variance was performed with Origin 6.0 software (Microcal Software Inc., Northampton, USA).

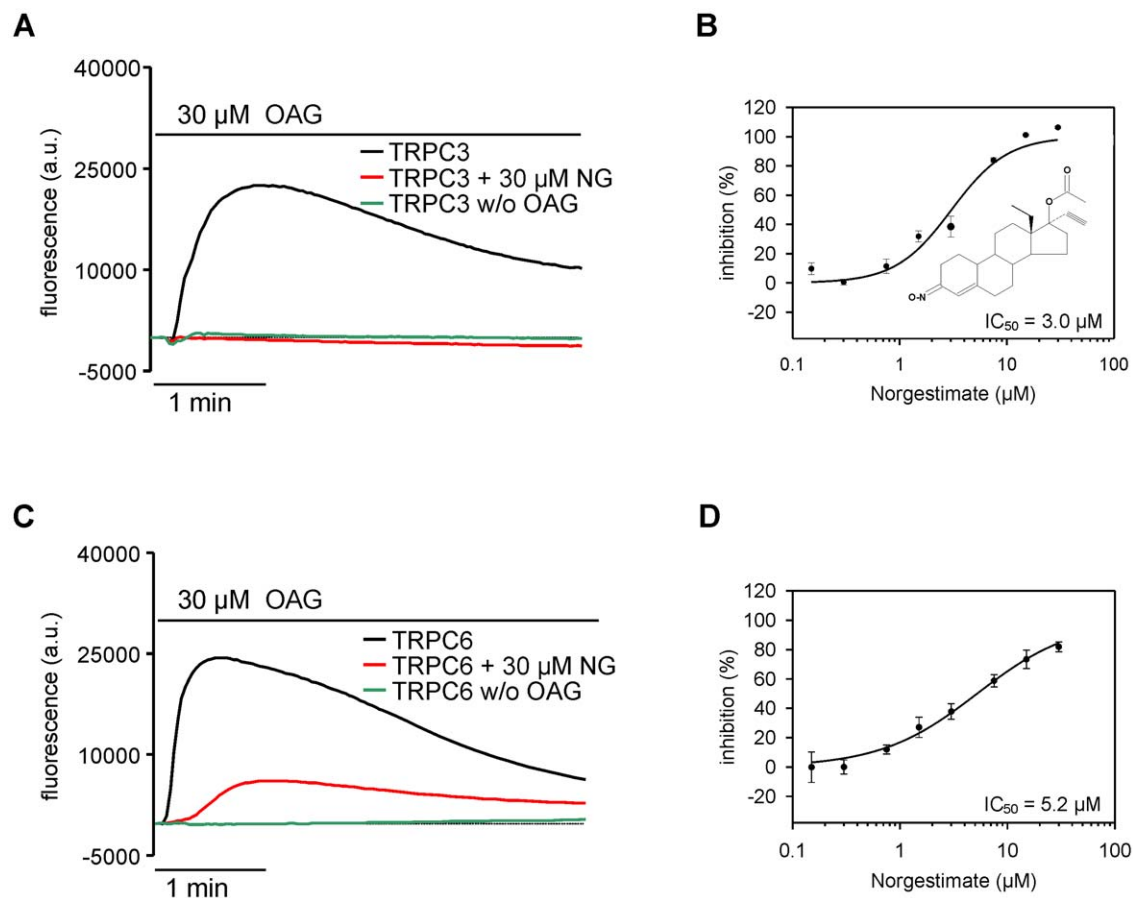

**Figure 1. Norgestimate inhibits TRPC3- and TRPC6-mediated Ca<sup>2+</sup> influx.** OAG-induced changes of [Ca<sup>2+</sup>]<sub>i</sub> in fluo-4-loaded TRPC3 CHO cells (**A**) and TRPC6 HEK-FITR cells (**C**) were measured in 96-well plates using a fluorometric imaging plate reader. Pre-incubation of cells with 30  $\mu$ M norgestimate (NG) significantly reduced TRPC3 and -6 mediated Ca<sup>2+</sup> entry. Representative fluorescence traces are shown. Concentration-response curves for inhibition of TRPC3 (**B**) and TRPC6 (**D**) by norgestimate were derived from the area under the fluorescence curves for each given concentration. The solid lines represent the best fit of the data to the Hill model with slopes of  $n = 1.67$  (TRPC3) and  $n = 0.97$  (TRPC6). Means  $\pm$  SEM of 3 wells (**B**) or 4 wells (**D**) are shown. The chemical structure of norgestimate is illustrated in **B**. doi:10.1371/journal.pone.0035393.g001

P values less than 0.05 were considered as statistically significant.  $IC_{50}$  were calculated with SigmaPlot (Systat software, San Jose, USA) using the sigmoidal Hill-model:  $f = 100 \cdot (C^n / (IC_{50}^n + C^n))$ ; where  $f$  is the inhibition,  $C$  is the applied drug concentration and  $n$  is the Hill coefficient. The half maximal effective concentration ( $EC_{50}$ ) of norgestimate-induced vasorelaxation was calculated analogously with  $R = y_0 + y_1 \cdot C^n / (EC_{50}^n + C^n)$ ; where  $R$  is relaxation,  $y_0$  and  $y_1$  are constants,  $C$  is the applied drug concentration and  $n$  is the Hill coefficient. Averaged data is expressed as means  $\pm$  SEM.

## Results

In order to discover compounds that modulate TRPC activity we developed fluorescence-based assays that allowed to measure TRPC-mediated  $Ca^{2+}$  entry using fluorometric imaging plate reader technology. Screening a selection of pharmacologically and biologically active compounds using these assays identified norgestimate as a potent TRPC3 and  $-6$  channel inhibitor. Norgestimate blocked OAG-induced  $Ca^{2+}$ -entry in TRPC3 and TRPC6 expressing cells with similar potency.  $IC_{50}$ s amounted to 3.0 and 5.2  $\mu$ M, respectively (Figure 1).

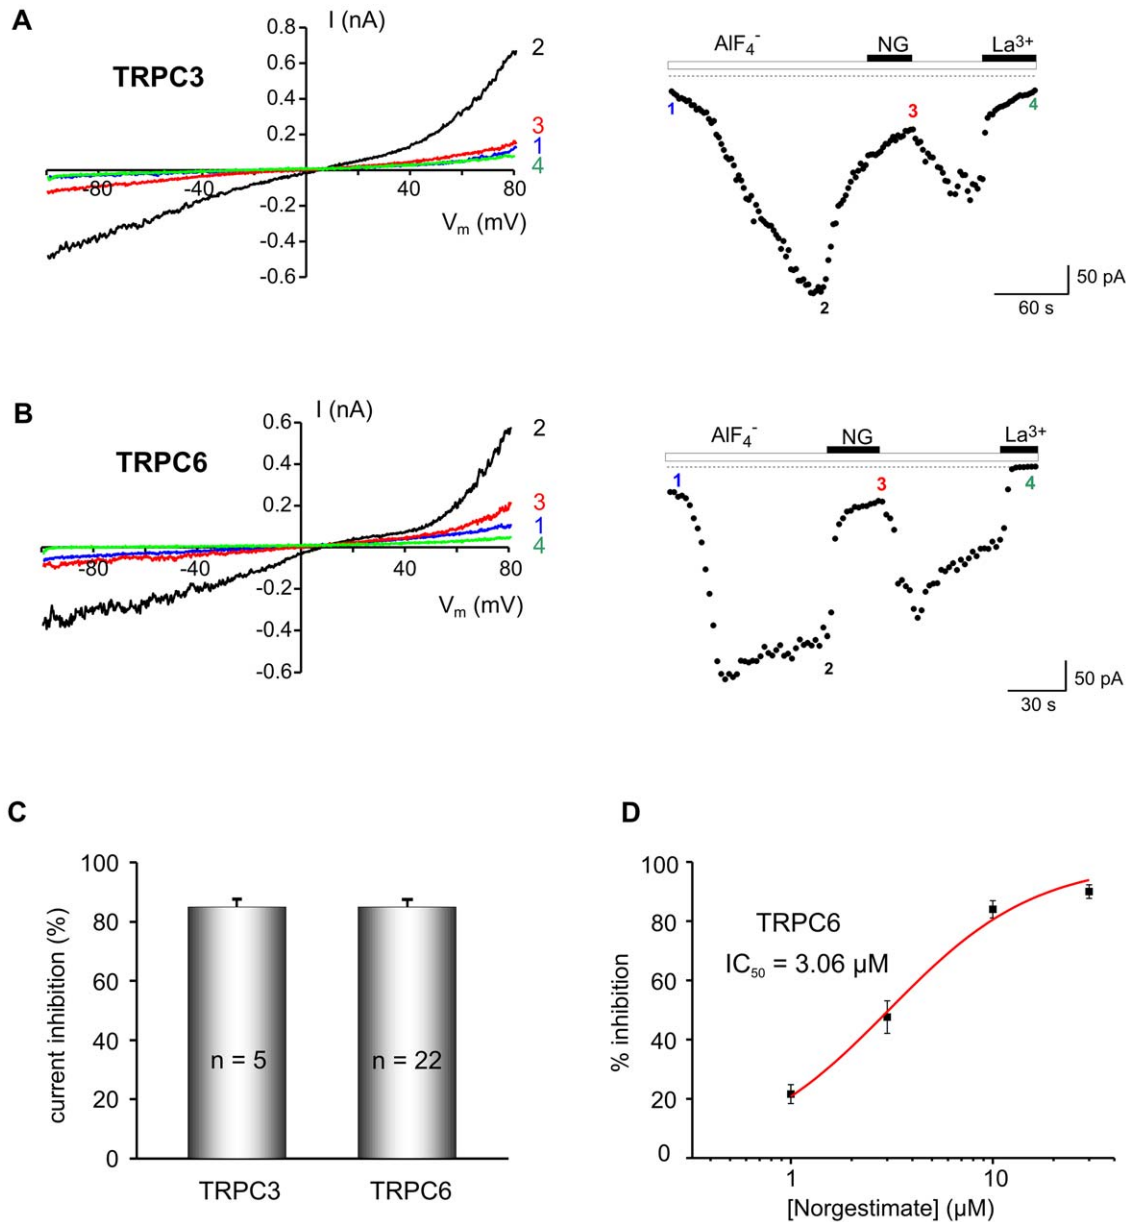

**Figure 2. Potent inhibition of TRPC3- and TRPC6-mediated currents by norgestimate.** Effect of 10  $\mu$ M norgestimate (NG) on whole-cell currents evoked by  $AlF_4^-$  infusion into TRPC3 (A) and TRPC6 (B) expressing cells. Current-voltage (I-V) relationships (left panels) and time course of currents recorded at  $-70$  mV (right panels) are shown. For measurement of I-V curves voltage ramps from  $-100$  to  $+80$  mV were applied at the time points indicated. Background currents were isolated by blocking of TRPC3 and  $-6$  with 100  $\mu$ M  $La^{3+}$ . Comparison of the mean inhibition of TRPC3 and  $-6$  by 10  $\mu$ M norgestimate (C) demonstrates equipotent suppression of both channels. N denotes the number of tested cells. Concentration-response relationship of the inhibition of TRPC6 by norgestimate (D). Means  $\pm$  SEM of  $n \geq 3$  experiments per concentration are shown. The line represents the best fit of the data to the dose-response equation with a Hill slope of 1.19. doi:10.1371/journal.pone.0035393.g002

To directly investigate the effect of norgestimate on TRPC currents we performed patch clamp experiments using the same TRPC expressing cell lines used for  $\text{Ca}^{2+}$  measurements. These experiments confirmed that 10  $\mu\text{M}$  norgestimate almost completely inhibited TRPC3 and -6 (Figure 2A–C). Further evaluation of the dose dependence of TRPC6 current inhibition by norgestimate yielded an  $\text{IC}_{50}$  of 3.06  $\mu\text{M}$  (Figure 2D). Thus, both direct current measurements and indirect fluorescence experiments showed a similar inhibitory activity of norgestimate towards TRPC3 and -6.

Steroid-sensitivity had previously been established for TRPC5 [19] which together with its close homolog TRPC4 defines a distinct subclass of TRPC channels that is not activated by diacylglycerol. We wanted to test the subtype selectivity of norgestimate and, therefore, studied the effect of the compound on TRPC5.

As illustrated in Figure 3 norgestimate suppressed TRPC5-mediated currents with an  $\text{IC}_{50}$  of 13.6  $\mu\text{M}$ , indicating a considerably lower potency of the synthetic gestagen towards this diacylglycerol-insensitive TRPC channel. Unfortunately, we were unable to determine the effects of norgestimate on TRPC4 currents since compound effects at 10  $\mu\text{M}$  were apparently small,

irreversible and could not be separated from the significant run-down of TRPC4-mediated currents.

Having established the prominent inhibitory effect of norgestimate on recombinant TRPC6 we next asked whether the compound similarly affects native TRPC6-mediated currents. In the aortic smooth muscle cell line A7r5 TRPC6 and/or TRPC6/7 channel complexes had previously been demonstrated to underlie vasopressin  $\text{V}_{1a}$ -receptor-activated cation currents [23–25]. Hence, we chose this model and measured inhibition of AVP-induced receptor-operated currents by norgestimate (Figure 4A). When 10  $\mu\text{M}$  norgestimate was applied to AVP-stimulated A7r5 cells, receptor-operated cation currents measured at  $-70$  mV were reversibly reduced by  $86.5 \pm 6.0\%$  ( $n = 8$ ), in good agreement with the effect on recombinant TRPC6 channels. Since AVP-induced  $\text{Ca}^{2+}$  release was not sensitive to norgestimate (Figure 4B), receptor-operated channel inhibition is likely due to a direct effect on the channels proteins rather than interaction of the compound with upstream signaling elements.

We extended the study of functional effects of norgestimate to intact vessel segments derived from thoracic rat aorta. Several investigators have reported expression of TRPC3/6 in this preparation [5,26]. Isometric force measurement showed that norgestimate concentration-dependently relaxed aortic segments

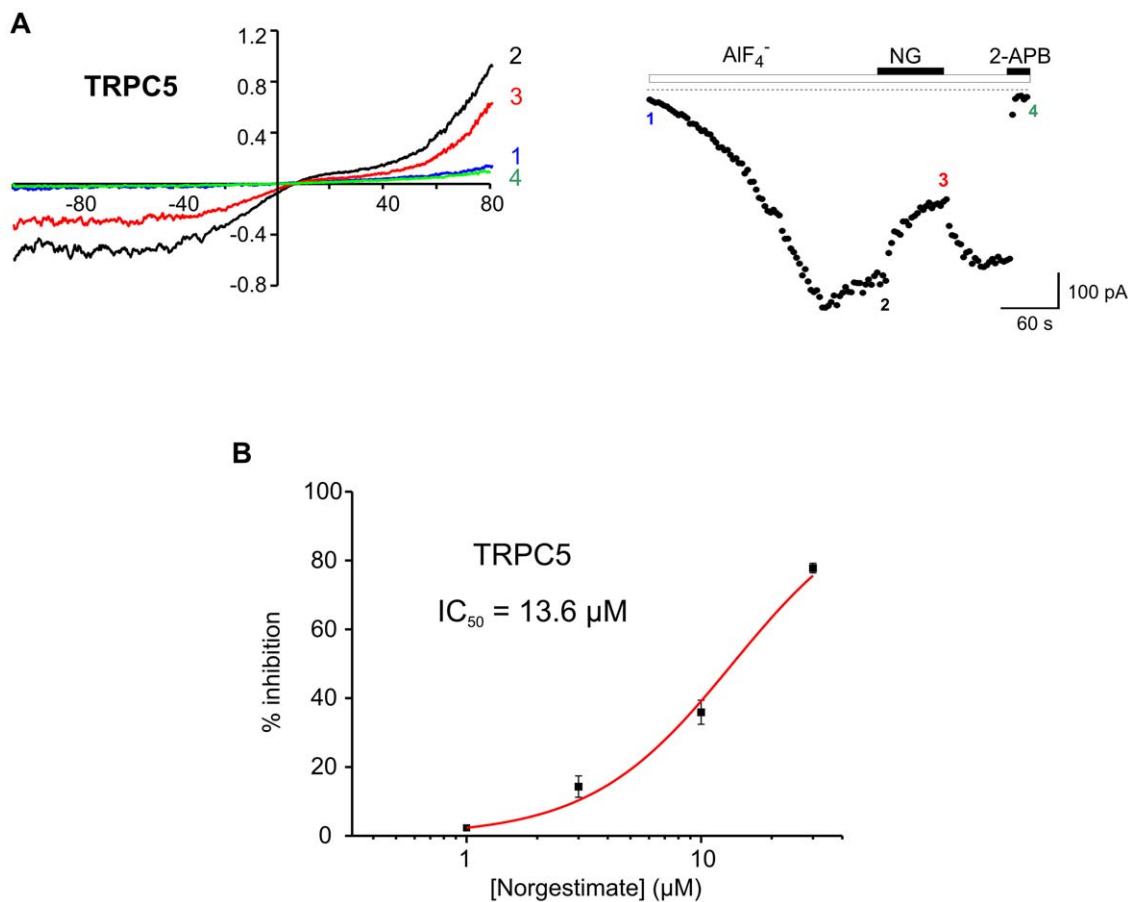

**Figure 3. Effect of norgestimate on TRPC5-mediated currents.** Whole-cell currents evoked by  $\text{AIF}_4^-$  infusion into TRPC5 expressing HEK-FITR cells were measured before and after application of 10  $\mu\text{M}$  norgestimate (NG) (A). Current-voltage (I–V) relationships (left panels) and time course of currents recorded at  $-70$  mV (right panels) are shown. For measurement of I–V curves voltage ramps from  $-100$  to  $+80$  mV were applied at the time points indicated. Background currents were isolated by blocking of TRPC5 with 10  $\mu\text{M}$  2-aminoethoxydiphenyl borate (2-APB). Concentration-response relationship of the inhibition of TRPC5 by norgestimate (B). Means  $\pm$  SEM of  $n \geq 3$  experiments per concentration are shown. The line represents the best fit of the data to the dose-response equation with a Hill slope of 1.43. doi:10.1371/journal.pone.0035393.g003



A

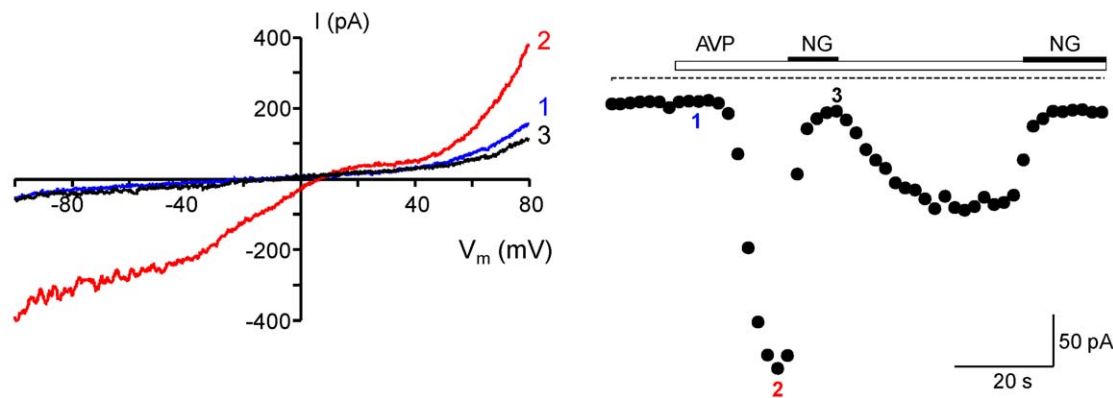

B

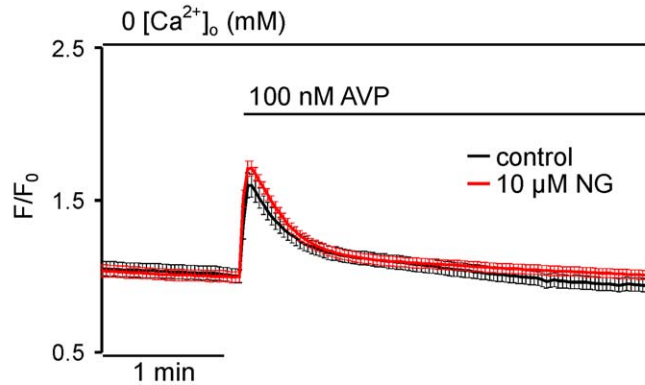

**Figure 4. Norgestimate blocks AVP-activated non-selective cation currents in A7r5 cells independent of vasopressin receptor function.** Effect of 10  $\mu\text{M}$  norgestimate (NG) on whole-cell currents evoked by 100 nM AVP in A7r5 cells (A). I–V relationships recorded at the indicated times (left panels) and time course of currents recorded at  $-60$  mV (right panels) are shown. The I–V curves were obtained during voltage ramps from  $-100$  to  $+80$  mV. Voltage-gated L-type  $\text{Ca}^{2+}$  channels were blocked by 5  $\mu\text{M}$  nimodipine during the whole experiment. Time-dependent changes of  $[\text{Ca}^{2+}]_i$  in fura-2-loaded A7r5 cells (B). Cells were pre-incubated with or without (control) 10  $\mu\text{M}$  norgestimate (NG) in calcium-free (1 mM EGTA) standard extracellular solution for 5 min before vasopressin receptor stimulation by application of 100 nM AVP. Data represent means  $\pm$  SEM from 33 cells (control) and 36 cells (norgestimate).  
doi:10.1371/journal.pone.0035393.g004

pre-contracted with the  $\alpha_1$ -receptor agonist phenylephrine (Figure 5). To exclude the possibility that norgestimate-induced relaxation was due to direct receptor blockage we tested the effect of the compound on recombinant  $\alpha_1$ -receptors expressed in CHO cells. Surprisingly, we observed that norgestimate significantly stimulated phenylephrine-induced  $\text{Ca}^{2+}$  release in this model (Figure S1). This stimulatory action on  $\alpha_1$ -receptor signaling may contribute to the relatively low vasorelaxing activity of norgestimate in isolated aortic rings. Nonetheless, our results indicate that norgestimate can be used to modulate TRPC-dependent functions *in situ*.

Recent experiments revealed that TRPC5 is inhibited by certain steroids including progesterone in a stereo-selective manner [19]. Because progesterone is known to induce vasorelaxation of diverse vessels, we wondered if part of this nongenomic progesterone effect may be due to inhibition of vascular TRPC channels. Therefore, we investigated the effects of progesterone on recombinant TRPC3, -4, -5 and -6. Figure 6 illustrates that

progesterone indeed attenuated  $\text{Ca}^{2+}$  entry through all TRPCs tested. 12.4  $\mu\text{M}$  and 18  $\mu\text{M}$  progesterone were required for half maximal inhibition of OAG-induced  $[\text{Ca}^{2+}]_i$  transients in TRPC3- and TRPC6 expressing cells. The hormone also suppressed trypsin-induced  $\text{Ca}^{2+}$  entry via TRPC4 and -5 with  $\text{IC}_{50}$ s of 6.2 and 11.8  $\mu\text{M}$ , respectively, demonstrating that diacylglycerol-insensitive TRPC family members were at least as sensitive to progesterone treatment as TRPC3 and -6.

These experiments confirm TRPC channels as novel targets of steroids and raise the possibility that TRPCs contribute to the vasoregulatory properties of these substances.

## Discussion

Our search for new pharmacological TRPC channel modulators led to the discovery of two steroids, namely norgestimate and progesterone, which differentially inhibited TRPC-mediated currents and  $\text{Ca}^{2+}$  influx.

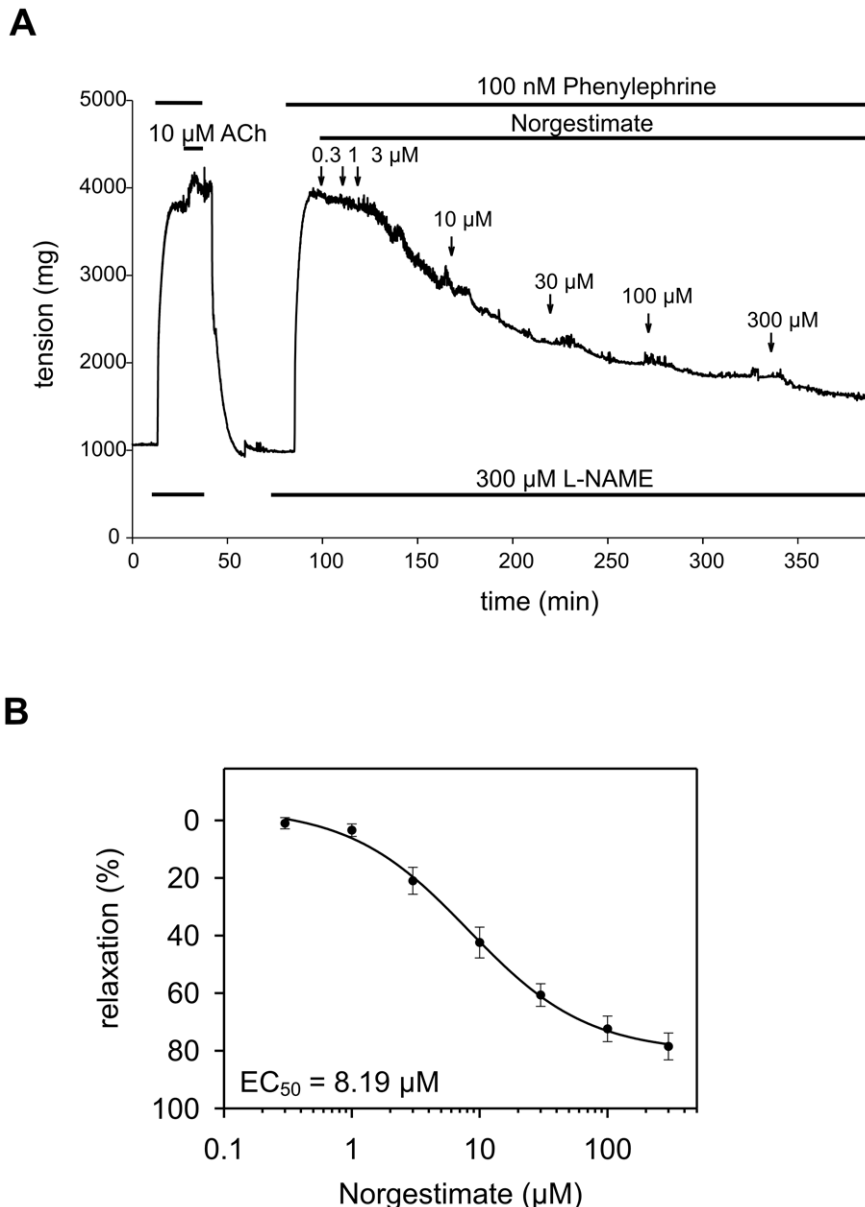

**Figure 5. Endothelium-independent relaxation of pre-contracted rat aortic rings by norgestimate.** Representative wire myograph recording (A) illustrating the effect of norgestimate on L-NAME treated intact aortic rings pre-contracted with phenylephrine. Compounds were applied as indicated in the perfusate. Acetylcholine (ACh) was applied to demonstrate the absence of endothelium-dependent vasorelaxation. Higher norgestimate concentrations could not be tested due to the limited solubility of the compound. Concentration-response curve of norgestimate-induced vasorelaxation (B). Norgestimate-induced relaxation was expressed as percentage of the phenylephrine-induced tension prior to norgestimate application. The solid line represents the best fit of the data to the Hill model with:  $y_0 = -4.26\%$ ,  $y_1 = 84.8\%$ , and  $n = 0.93$ . Data represent means  $\pm$  SEM ( $n = 6$ ).  
doi:10.1371/journal.pone.0035393.g005

Norgestimate was found to be a potent inhibitor of diacylglycerol-sensitive TRPC channels. The compound blocked TRPC6 in patch-clamp experiments with an  $IC_{50}$  of  $\sim 3 \mu$ M and showed a similar or slightly higher inhibitory potency on TRPC3 currents and TRPC3-mediated  $Ca^{2+}$  entry, respectively. Diacylglycerol-insensitive TRPC5 currents were also reduced by norgestimate but required a considerably higher concentration ( $\sim 14 \mu$ M) for half maximal inhibition.

The effects of norgestimate on TRPC currents occurred rapidly, suggesting a direct modulation of channel proteins rather than genomic effects via steroid receptors. We could not discern a

significant interference of  $10 \mu$ M norgestimate with cytosolic calcium responses elicited by vasopressin receptors in A7r5 cells. However, the compound up-regulated  $\alpha_1$ -receptor induced  $Ca^{2+}$  release in CHO cells. Thus, further evaluation of norgestimate specificity is needed to fully estimate the potential applications and limitations of the compound as a blocker of diacylglycerol-sensitive TRPC channels. Nevertheless, the rather stimulatory effects of norgestimate on intracellular  $Ca^{2+}$  release exclude inositol 1,4,5-trisphosphate receptor antagonism or inhibition of the  $G_{q/11}$ /phospholipase C signaling cascade as mechanisms of TRPC channel inhibition.

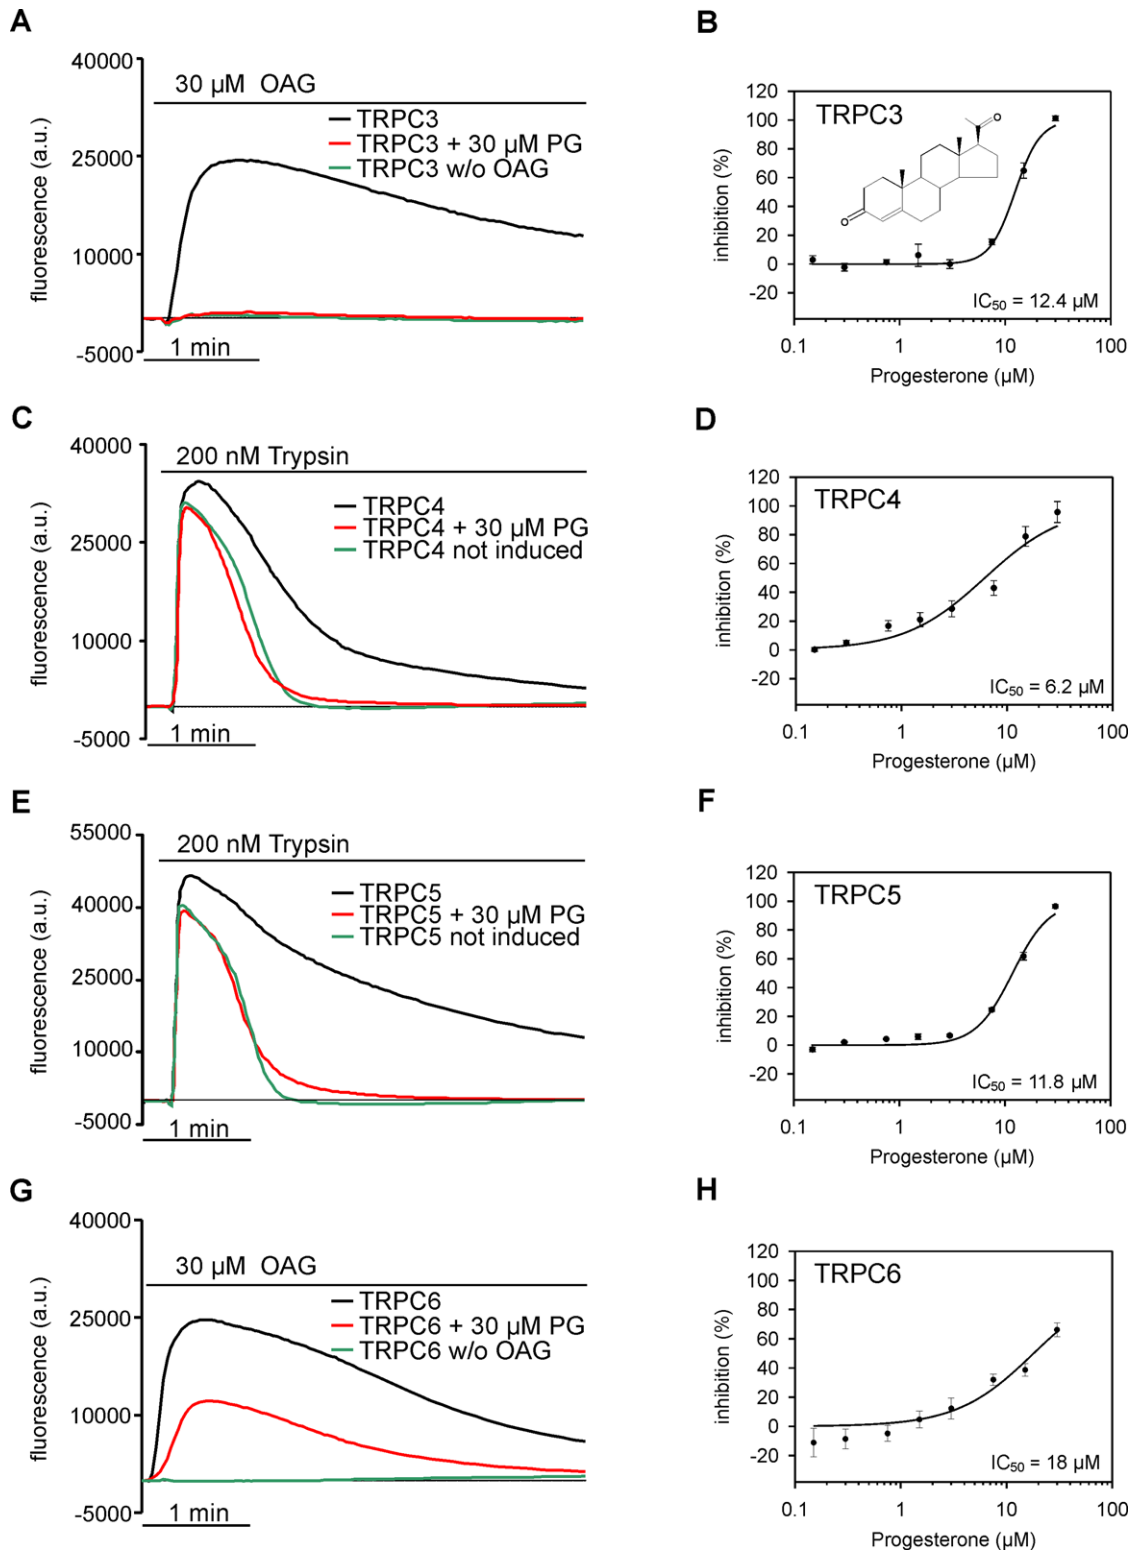

**Figure 6. Progesterone inhibits TRPC-mediated  $\text{Ca}^{2+}$  influx.** Time-dependent changes of  $[\text{Ca}^{2+}]_i$  in fluo-4-loaded TRPC3 CHO cells (**A**), TRPC4- (**C**), TRPC5- (**E**) and TRPC6 HEK-FITR (**G**) cells were measured using a fluorometric imaging plate reader. Representative traces illustrate fluorescence changes induced by application of 200 nM trypsin or 30  $\mu\text{M}$  OAG with or without pre-incubation with 30  $\mu\text{M}$  progesterone (PG). TRPC-independent  $\text{Ca}^{2+}$  release in **C** and **E** was determined in non-induced TRPC4 and -5 HEK-FITR cells. Concentration response curves for inhibition of TRPC3 (**B**), TRPC4 (**D**), TRPC5 (**F**) and TRPC6 (**H**) by progesterone were derived from the area under the fluorescence curves for each given concentration. The solid lines represent the best fit of the data to the Hill model with slopes of  $n = 3.6$  (TRPC3), 1.15 (TRPC4), 2.5 (TRPC5), and 1.2 (TRPC6). Data represent means of 3 wells (**B**) or 4 wells (**D**, **F**, **H**). The chemical structure of progesterone is illustrated in **B**. doi:10.1371/journal.pone.0035393.g006



Notably, norgestimate inhibited recombinant TRPC6 channels and endogenous vasopressin receptor-activated cation currents in A7R5 cells with almost the same potency. There is evidence suggesting that the AVP-induced cation current in A7R5 is carried by TRPC6/7 heteromeric channels [25]. Based on this assumption it seems plausible, that other possible heteromers formed by diacylglycerol-sensitive TRPC proteins share a similar high sensitivity to norgestimate. Therefore, the steroid will be a useful tool for characterisation of native TRPC3/6/7 containing channel complexes. In line with this view, our experiments on isolated rat aorta indicate that norgestimate can be used to investigate TRPC-mediated functions in tissue preparations.

Norgestimate is a progestin (a synthetic gestagen). Combined with ethinyl estradiol it is a component of oral contraceptives widely used in humans. It would be of great interest to investigate whether other synthetic gestagens share the TRPC-blocking activity of norgestimate and whether any of the numerous cardiovascular effects of norgestimate- or other progestin-containing oral contraceptives can be assigned to TRP channel inhibition.

Prior to this study, Maheed et al. [19] showed that TRPC5 is inhibited by the pregnancy-maintaining hormone progesterone and other neurosteroids. Our  $\text{Ca}^{2+}$  measurements extend these findings and demonstrate that in addition to TRPC5 progesterone also inhibited TRPC3, -4, and -6. However, in contrast to norgestimate no preferential effects of progesterone on diacylglycerol-sensitive channel subtypes were observed. This differential sensitivity of TRPC family members to progesterone and norgestimate provides further support to the notion that channel-steroid interaction is based on direct, structure-driven binding and not caused by unspecific steroid-induced perturbation of membrane lipid bilayers.

The physiological significance of TRPC channel regulation by progesterone remains to be established. Our data suggest that in addition to neurological effects of neurosteroids [19] TRPCs may contribute to vascular effects of steroid hormones. Several studies have shown that progesterone rapidly relaxed vessels, e.g. pig coronary arteries [27] and rat aorta [28,29]. This vasorelaxation is endothelium-independent and mediated at least partly through inhibition of L-type  $\text{Ca}^{2+}$  channels [30,31]. Nevertheless, an involvement of other ion channels, including receptor-operated cation channels, has also been proposed [28,29] and would be compatible with the widespread expression of TRPC channels in smooth muscle (reviewed in [32,33]).

It is of note, that several TRPC channel proteins, in particular TRPC1, -4, and -6 have been detected in human myometrium [34–36]. Pregnancy is characterized by elevated progesterone plasma levels that can reach up to  $1\ \mu\text{M}$  [31,37]. Given that progesterone is highly lipophilic and has a large volume of distribution [38], tissue concentrations are likely even higher and may achieve the effective concentrations for TRPC channel

inhibition. Therefore, it is conceivable that TRPC channel blockade by high gestational progesterone concentrations is part of the adaptive process that limits uterine contractility during pregnancy [39].

With estimated  $15\ \mu\text{M}$  [40], progesterone concentrations within the placenta are even higher than in other tissues. Such levels of progesterone have demonstrated immuno-suppressive effects important for prevention of fetal-maternal rejection *in utero* [41]. As many ion channels including TRPCs are involved in immunomodulation [42] attenuation of TRPC-dependent  $\text{Ca}^{2+}$  signaling could play a role in progesterone-induced immunosuppression.

To further corroborate these hypotheses studies of TRPC channel regulation by steroid hormones in native tissues are highly desirable.

## Supporting Information

**Figure S1 Stimulatory effect of norgestimate on  $\alpha_{1A}$ -receptor-mediated  $\text{Ca}^{2+}$  signaling in CHO cells.** (A) Phenylephrine (Phe) -induced changes of  $[\text{Ca}^{2+}]_i$  were measured in a stable CHO cell line expressing human  $\alpha_{1A}$ -adrenoceptors. Cells loaded with fluo-4 were pre-incubated with or without  $30\ \mu\text{M}$  norgestimate (NG) and challenged with  $10\ \mu\text{M}$  phenylephrine or control buffer. Representative traces are shown. Fluorometric imaging plate reader  $[\text{Ca}^{2+}]_i$  measurements were performed essentially as described for HEK-FITR cells (see Materials and Methods) with the exception that the extracellular buffer contained  $1\ \text{mM}$  EGTA instead of  $2\ \text{mM}$   $\text{Ca}^{2+}$ . (B) The relative increase in  $\text{Ca}^{2+}$  release induced in the presence of different concentrations of norgestimate is shown. Release was estimated from the area under the curve after application of phenylephrine and normalized to the effect in the absence of norgestimate. Data shown represent means  $\pm$  SEM ( $n=4$ ). Significance of changes vs. control is indicated by \* ( $p<0.05$ ), \*\* ( $p<0.01$ ), and \*\*\* ( $p<0.001$ ). (TIF)

## Acknowledgments

We would like to thank Andrea Bieberstein and Jennifer Reb for expert technical assistance and Dr. Klaus Steinmeyer for critical reading of the manuscript. This work was done in partial fulfilment of the requirements for the Ph.D. degree of S.M. at the J. W. Goethe University, Frankfurt.

## Author Contributions

Conceived and designed the experiments: SM PC TS TL ML HR CS. Performed the experiments: SM PC TS TL CS. Analyzed the data: SM PC HWK CS. Contributed reagents/materials/analysis tools: SM PC TS ML TL WD HR. Wrote the paper: SM CS.

## References

- Ramsey IS, Delling M, Clapham DE (2006) An introduction to TRP channels. *Annu Rev Physiol* 68: 619–647.
- Venkatachalam K, Montell C (2007) TRP channels. *Annu Rev Biochem* 76: 387–417.
- Trebak M, Lemonnier L, Smyth JT, Vazquez G, Putney JW, Jr. (2007) Phospholipase C-coupled receptors and activation of TRPC channels. *Handb Exp Pharmacol*. pp 593–614.
- Freichel M, Suh SH, Pfeifer A, Schweig U, Trost C, et al. (2001) Lack of an endothelial store-operated  $\text{Ca}^{2+}$  current impairs agonist-dependent vasorelaxation in TRP4 $^{-/-}$  mice. *Nat Cell Biol* 3: 121–127.
- Dietrich A, Mederos YS, Gollasch M, Gross V, Storch U, et al. (2005) Increased vascular smooth muscle contractility in TRPC6 $^{-/-}$  mice. *Mol Cell Biol* 25: 6980–6989.
- Zanou N, Shapovalov G, Louis M, Tajeddine N, Gallo C, et al. (2010) Role of TRPC1 channel in skeletal muscle function. *Am J Physiol Cell Physiol* 298: C149–C162.
- Seth M, Zhang ZS, Mao L, Graham V, Burch J, et al. (2009) TRPC1 channels are critical for hypertrophic signaling in the heart. *Circ Res* 105: 1023–1030.
- Stowers L, Holy TE, Meister M, Dulac C, Koentges G (2002) Loss of sex discrimination and male-male aggression in mice deficient for TRP2. *Science* 295: 1493–1500.
- Leybold BG, Yu CR, Leinders-Zufall T, Kim MM, Zufall F, et al. (2002) Altered sexual and social behaviors in trp2 mutant mice. *Proc Natl Acad Sci U S A* 99: 6376–6381.
- Becker EB, Oliver PL, Glitsch MD, Banks GT, Achilli F, et al. (2009) A point mutation in TRPC3 causes abnormal Purkinje cell development and cerebellar ataxia in moonwalker mice. *Proc Natl Acad Sci U S A* 106: 6706–6711.

11. Hartmann J, Dragicevic E, Adelsberger H, Henning HA, Sumser M, et al. (2008) TRPC3 channels are required for synaptic transmission and motor coordination. *Neuron* 59: 392–398.
12. Riccio A, Li Y, Moon J, Kim KS, Smith KS, et al. (2009) Essential role for TRPC5 in amygdala function and fear-related behavior. *Cell* 137: 761–772.
13. Boulay G, Zhu X, Peyton M, Jiang M, Hurst R, et al. (1997) Cloning and expression of a novel mammalian homolog of *Drosophila* transient receptor potential (Trp) involved in calcium entry secondary to activation of receptors coupled by the G<sub>q</sub> class of G protein. *J Biol Chem* 272: 29672–29680.
14. Pena F, Ordaz B (2008) Non-selective cation channel blockers: potential use in nervous system basic research and therapeutics. *Mini Rev Med Chem* 8: 812–819.
15. Kraft R (2007) The Na<sup>+</sup>/Ca<sup>2+</sup> exchange inhibitor KB-R7943 potently blocks TRPC channels. *Biochem Biophys Res Commun* 361: 230–236.
16. He LP, Hewavitharana T, Soboloff J, Spassova MA, Gill DL (2005) A functional link between store-operated and TRPC channels revealed by the 3,5-bis(trifluoromethyl)pyrazole derivative, BTP2. *J Biol Chem* 280: 10997–11006.
17. Zitt C, Strauss B, Schwarz EC, Spaeth N, Rast G, et al. (2004) Potent inhibition of Ca<sup>2+</sup> release-activated Ca<sup>2+</sup> channels and T-lymphocyte activation by the pyrazole derivative BTP2. *J Biol Chem* 279: 12427–12437.
18. Kiyonaka S, Kato K, Nishida M, Mio K, Numaga T, et al. (2009) Selective and direct inhibition of TRPC3 channels underlies biological activities of a pyrazole compound. *Proc Natl Acad Sci U S A* 106: 5400–5405.
19. Majeed Y, Amer M, Agarwal A, McKeown L, Porter K, et al. (2011) Stereoselective inhibition of transient receptor potential (TRP)C5 cation channels by neuroactive steroids. *Br J Pharmacol* 162: 1509–1520.
20. Kawabata A, Saifeddine M, Al-Ani B, Leblond L, Hollenberg MD (1999) Evaluation of proteinase-activated receptor-1 (PAR1) agonists and antagonists using a cultured cell receptor desensitization assay: activation of PAR2 by PAR1-targeted ligands. *J Pharmacol Exp Ther* 288: 358–370.
21. Hamill OP, Marty A, Neher E, Sakmann B, Sigworth FJ (1981) Improved patch-clamp techniques for high-resolution current recording from cells and cell-free membrane patches. *Pflügers Arch* 391: 85–100.
22. Drab M, Verkade P, Elger M, Kasper M, Lohn M, et al. (2001) Loss of caveolae, vascular dysfunction, and pulmonary defects in caveolin-1 gene-disrupted mice. *Science* 293: 2449–2452.
23. Soboloff J, Spassova M, Xu W, He LP, Cuesta N, et al. (2005) Role of endogenous TRPC6 channels in Ca<sup>2+</sup> signal generation in A7r5 smooth muscle cells. *J Biol Chem* 280: 39786–39794.
24. Jung S, Strotmann R, Schultz G, Plant TD (2002) TRPC6 is a candidate channel involved in receptor-stimulated cation currents in A7r5 smooth muscle cells. *Am J Physiol Cell Physiol* 282: C347–C359.
25. Maruyama Y, Nakanishi Y, Walsh EJ, Wilson DP, Welsh DG, et al. (2006) Heteromultimeric TRPC6–TRPC7 channels contribute to arginine vasopressin-induced cation current of A7r5 vascular smooth muscle cells. *Circ Res* 98: 1520–1527.
26. Facemire CS, Mohler PJ, Arendshorst WJ (2004) Expression and relative abundance of short transient receptor potential channels in the rat renal microcirculation. *Am J Physiol Renal Physiol* 286: F546–F551.
27. Crews JK, Khalil RA (1999) Antagonistic effects of 17 beta-estradiol, progesterone, and testosterone on Ca<sup>2+</sup> entry mechanisms of coronary vasoconstriction. *Arterioscler Thromb Vasc Biol* 19: 1034–1040.
28. Glusa E, Graser T, Wagner S, Oettel M (1997) Mechanisms of relaxation of rat aorta in response to progesterone and synthetic progestins. *Maturitas* 28: 181–191.
29. Mukerji MS, Leathard HL, Huddart H (2000) The effect of progesterone on spontaneous and agonist-evoked contractions of the rat aorta and portal vein. *J Pharm Pharmacol* 52: 843–849.
30. Zhang M, Benishin CG, Pang PK (2002) Rapid inhibition of the contraction of rat tail artery by progesterone is mediated by inhibition of calcium currents. *J Pharm Pharmacol* 54: 1667–1674.
31. Barbagallo M, Dominguez LJ, Licata G, Shan J, Bing L, et al. (2001) Vascular Effects of Progesterone: Role of Cellular Calcium Regulation. *Hypertension* 37: 142–147.
32. Beech DJ (2005) Emerging functions of 10 types of TRP cationic channel in vascular smooth muscle. *Clin Exp Pharmacol Physiol* 32: 597–603.
33. Dietrich A, Kalwa H, Gudermann T (2010) TRPC channels in vascular cell function. *Thromb Haemost* 103: 262–270.
34. Dalrymple A, Slater DM, Beech D, Poston L, Tribe RM (2002) Molecular identification and localization of Trp homologues, putative calcium channels, in pregnant human uterus. *Mol Hum Reprod* 8: 946–951.
35. Ku CY, Babich L, Word RA, Zhong M, Ulloa A, et al. (2006) Expression of transient receptor channel proteins in human fundal myometrium in pregnancy. *J Soc Gynecol Invest* 13: 217–225.
36. Yang M, Gupta A, Shlykov SG, Corrigan R, Tsujimoto S, et al. (2002) Multiple Trp isoforms implicated in capacitative calcium entry are expressed in human pregnant myometrium and myometrial cells. *Biol Reprod* 67: 988–994.
37. Johansson ED (1969) Plasma levels of progesterone in pregnancy measured by a rapid competitive protein binding technique. *Acta Endocrinol (Copenh)* 61: 607–617.
38. Gangrade NK, Boudinot FD, Price JC (1992) Pharmacokinetics of progesterone in ovariectomized rats after single dose intravenous administration. *Biopharm Drug Dispos* 13: 703–709.
39. Chang K, Lubo Z (2008) Review article: steroid hormones and uterine vascular adaptation to pregnancy. *Reprod Sci* 15: 336–348.
40. Runnebaum B, Stober I, Zander J (1975) Progesterone, 20 alpha-dihydroprogesterone and 20 beta-dihydroprogesterone in mother and child at birth. *Acta Endocrinol (Copenh)* 80: 569–576.
41. Stites DP, Siiteri PK (1983) Steroids as immunosuppressants in pregnancy. *Immunol Rev* 75: 117–138.
42. Schwarz EC, Wolfs MJ, Tonner S, Wenning AS, Quintana A, et al. (2007) TRP channels in lymphocytes. *Handb Exp Pharmacol*. pp 445–456.
